# Supplementary material
Source: PubMed Central journal article supplement (PMC6938224)
Supplement: NIHMS710156-supplement-Supplemental_Material.pdf [file NIHMS710156-supplement-Supplemental_Material.pdf]

## SUPPLEMENTAL MATERIAL

**Supplemental Table 1. Selected baseline characteristics comparing all CHDS mothers to mothers in the analysis sample**

|                                   | All CHDS Mothers<br>N=15,528 |          | Mothers in Analysis<br>N=14,062 |          |
|-----------------------------------|------------------------------|----------|---------------------------------|----------|
| <b>Characteristic at Baseline</b> | <b>N</b>                     | <b>%</b> | <b>N</b>                        | <b>%</b> |
| <b>Mother's Race/Ethnicity</b>    |                              |          |                                 |          |
| White                             | 10,194                       | 67.0     | 9,334                           | 67.6     |
| African American                  | 3,591                        | 23.6     | 3,190                           | 23.1     |
| Hispanic                          | 462                          | 3.0      | 406                             | 2.9      |
| Asian                             | 550                          | 3.6      | 491                             | 3.6      |
| Multi-racial/Other                | 415                          | 2.7      | 382                             | 2.8      |
| <b>Mother's Age (quartiles)</b>   |                              |          |                                 |          |
| ≤22 years                         | 4,019                        | 26.2     | 3,678                           | 26.5     |
| 23-26 years                       | 3,823                        | 24.9     | 3,525                           | 25.4     |
| 27-31 years                       | 3,667                        | 23.9     | 3,322                           | 23.9     |
| 30+ years                         | 3,833                        | 25.0     | 3,382                           | 24.3     |
| <b>Mother's Parity</b>            |                              |          |                                 |          |
| Primiparous                       | 5,313                        | 33.9     | 4,757                           | 33.8     |
| Multiparous                       | 10,176                       | 66.13    | 9,305                           | 66.2     |
| <b>Marital Status</b>             |                              |          |                                 |          |
| Married                           | 11,600                       | 92.4     | 10,717                          | 92.4     |
| Other                             | 959                          | 7.6      | 876                             | 7.6      |
| <b>Mother's Education</b>         |                              |          |                                 |          |
| Less than High School             | 2,276                        | 18.0     | 2,128                           | 18.1     |
| High School/Trade School          | 4,039                        | 31.9     | 3,741                           | 31.9     |
| College                           | 6,347                        | 50.1     | 5,867                           | 50.0     |
| <b>Mother's Employment</b>        |                              |          |                                 |          |
| Homemaker                         | 6,593                        | 54.7     | 6,166                           | 55.0     |
| Professional/Managerial           | 1,488                        | 12.4     | 1,367                           | 12.2     |
| Secretarial/Clerical              | 2,974                        | 24.7     | 2,764                           | 24.6     |
| Laborer (Housework/Factory)       | 929                          | 7.7      | 855                             | 7.6      |
| Other                             | 67                           | 0.6      | 64                              | 0.6      |
| <b>Maternal BMI<sup>†</sup></b>   |                              |          |                                 |          |
| <25 kg/m <sup>2</sup>             | 10,489                       | 79.2     | 9,831                           | 79.3     |
| ≥25 kg/m <sup>2</sup>             | 2,757                        | 20.8     | 2,563                           | 20.7     |
| <b>Mother's Smoking</b>           |                              |          |                                 |          |
| Never                             | 5,664                        | 47.1     | 5,300                           | 47.3     |
| Current                           | 4,293                        | 35.7     | 3,965                           | 35.4     |
| Past                              | 2,078                        | 17.3     | 1,943                           | 17.3     |

|                                                  |       |       |       |      |
|--------------------------------------------------|-------|-------|-------|------|
| <b>Mother's Coffee Consumption (quartiles)*</b>  |       |       |       |      |
| <1/2 cup per day                                 | 2,451 | 23.35 | 2,319 | 23.7 |
| 1/2-1 cup per day                                | 2,244 | 21.37 | 2,101 | 21.4 |
| 2-3 cups per day                                 | 2,783 | 26.51 | 2,604 | 26.6 |
| 4+ cups per day                                  | 3,021 | 28.77 | 2,776 | 28.3 |
| <b>Mother's Alcohol Consumption (quartiles)*</b> |       |       |       |      |
| <1 drink per week <sup>†</sup>                   | 4,653 | 44.3  | 4,358 | 44.5 |
| 1-2 drinks per week                              | 3,708 | 35.3  | 3,475 | 35.4 |
| 3+ drinks per week                               | 2,143 | 20.4  | 1,971 | 20.1 |
| <b>Family Income (quartiles)*<sup>§</sup></b>    |       |       |       |      |
| <\$5,000                                         | 2,358 | 22.2  | 2,196 | 22.2 |
| \$5,000-\$6,999                                  | 3,121 | 29.4  | 2,922 | 29.5 |
| \$7,000-\$8,999                                  | 2,332 | 22.0  | 2,181 | 22.0 |
| ≥\$9,000                                         | 2,803 | 26.4  | 2,595 | 26.2 |
| <b>Offspring Birthweight (quartiles)*</b>        |       |       |       |      |
| ≤2,940 gms                                       | 3,744 | 25.6  | 3,456 | 24.8 |
| 2,941-3276 gms                                   | 3,807 | 26.0  | 3,633 | 26.1 |
| 3277-3584 gms                                    | 3,371 | 23.0  | 3,248 | 23.3 |
| ≥3585 gms                                        | 3,781 | 25.4  | 3,580 | 25.7 |
| <b>Offspring Gestational Age (quartiles)*</b>    |       |       |       |      |
| ≤38 weeks                                        | 4,514 | 29.5  | 3,593 | 25.6 |
| 39 weeks                                         | 2,948 | 19.2  | 2,833 | 20.2 |
| 40 weeks                                         | 3,362 | 21.9  | 3,260 | 23.2 |
| ≥41 weeks                                        | 4,505 | 29.4  | 4,376 | 32.1 |

---

\*Quartiles are based on the distribution of variables among all CHDS births. For birthweight and gestational age, quartile cutpoints were based on the distribution among liveborn births.

†Maternal body mass index (BMI) was calculated from the earliest measured weight in kilograms divided by height in meters squared. Weight was adjusted to compensate for variation in the timing of measurement by regressing weight on gestational age using the locally weighted scatterplot smoothing technique.

‡Due to clumping of data, quartiles 1 and 2 are combined.

§Median family income in Oakland, California in 1959 was \$6,303.00 according to the 1960 Bay Area Census.

**Supplemental Table 2. Age-Adjusted Rates of CVD by Pregnancy Complication**

| <b>Study Variable</b>                       | <b>Cases</b> | <b>Person-years</b> | <b>Incidence Rate per 100,000</b> | <b>95% Confidence Interval</b> |
|---------------------------------------------|--------------|---------------------|-----------------------------------|--------------------------------|
| <b>Preexisting Hypertension*</b>            |              |                     |                                   |                                |
| Absent                                      | 327          | 444,147             | 72.4                              | 64.7, 80.7                     |
| Present                                     | 40           | 9,480               | 288.9                             | 194.8, 408.1                   |
| <b>Gestational hypertension*</b>            |              |                     |                                   |                                |
| Absent                                      | 311          | 397,158             | 76.5                              | 68.2, 85.5                     |
| Present                                     | 56           | 56,469              | 94.7                              | 71.4, 123.1                    |
| <b>Glycosuria*</b>                          |              |                     |                                   |                                |
| Absent                                      | 355          | 443,006             | 78.0                              | 70.1, 86.6                     |
| Present                                     | 4            | 1,886               | 282.3                             | 65.6, 746.8                    |
| <b>Preterm delivery*</b>                    |              |                     |                                   |                                |
| Absent                                      | 310          | 413,014             | 73.2                              | 65.3, 81.9                     |
| Present                                     | 57           | 40,613              | 137.6                             | 103.5, 179.1                   |
| <b>Hemoglobin decline*</b>                  |              |                     |                                   |                                |
| Absent                                      | 135          | 220,791             | 59.7                              | 50.1, 70.7                     |
| Present                                     | 25           | 21,987              | 110.5                             | 71.2, 163.6                    |
| <b>Small for Gestational Age*</b>           |              |                     |                                   |                                |
| Absent                                      | 326          | 409,388             | 77.2                              | 69.0, 86.0                     |
| Present                                     | 39           | 40,511              | 96.6                              | 68.6, 132.1                    |
| <b>Pre-eclamptic Pregnancy*</b>             |              |                     |                                   |                                |
| Absent                                      | 342          | 441,134             | 75.6                              | 67.8, 84.1                     |
| Present                                     | 25           | 12,493              | 192.3                             | 122.9, 286.0                   |
| <b>Gestational Timing of Pre-eclampsia*</b> |              |                     |                                   |                                |
| No Pre-eclampsia                            | 342          | 441,134             | 75.6                              | 67.8, 84.1                     |
| Pre-eclampsia After 34 weeks                | 20           | 11,307              | 179.1                             | 64.8, 466.0                    |
| Pre-eclampsia Before 34 weeks               | 5            | 1,186               | 199.7                             | 108.3, 278.1                   |

\*Variables were recorded as observed or not observed in the analysis pregnancy. Number of events may not sum to total due to missing data.

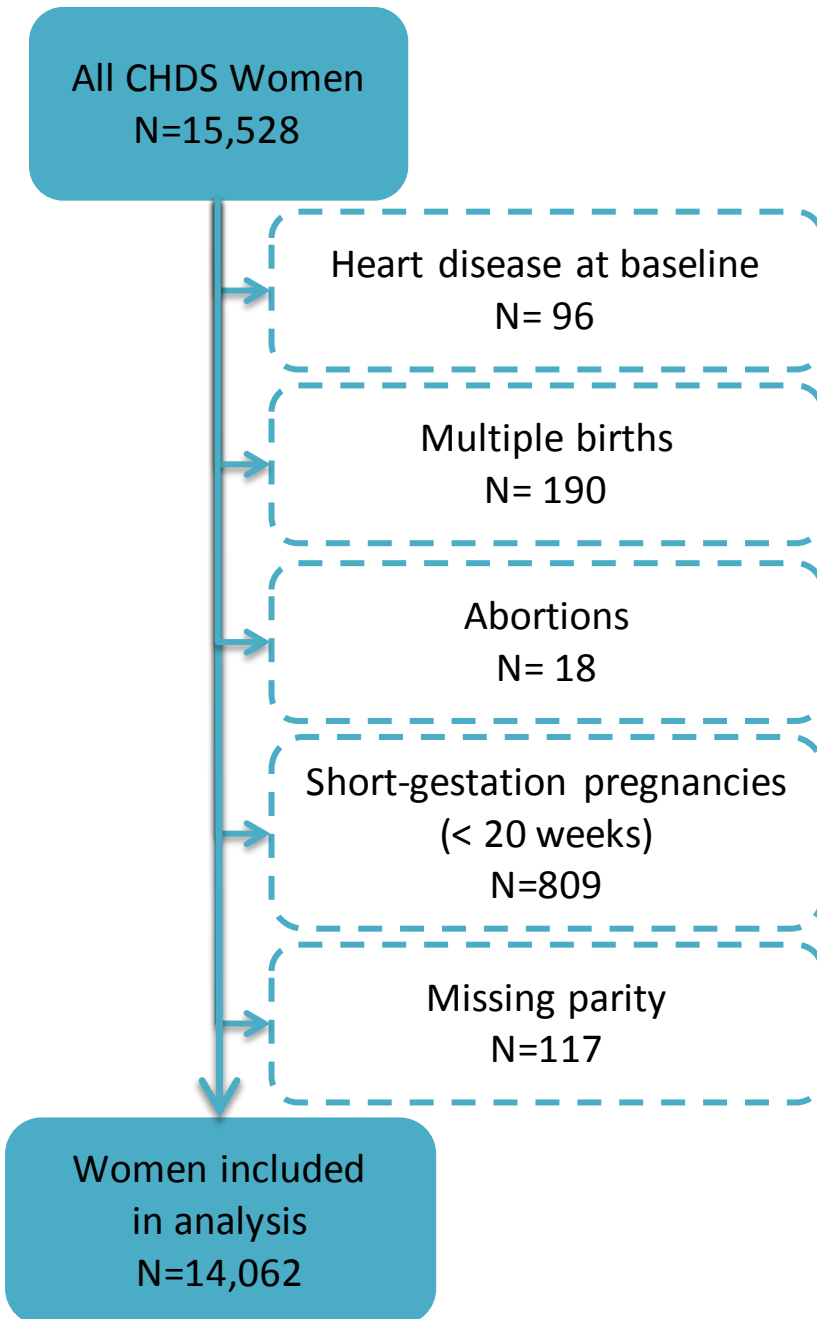

Supplemental Figure 1. Consort Diagram of Analysis Sample

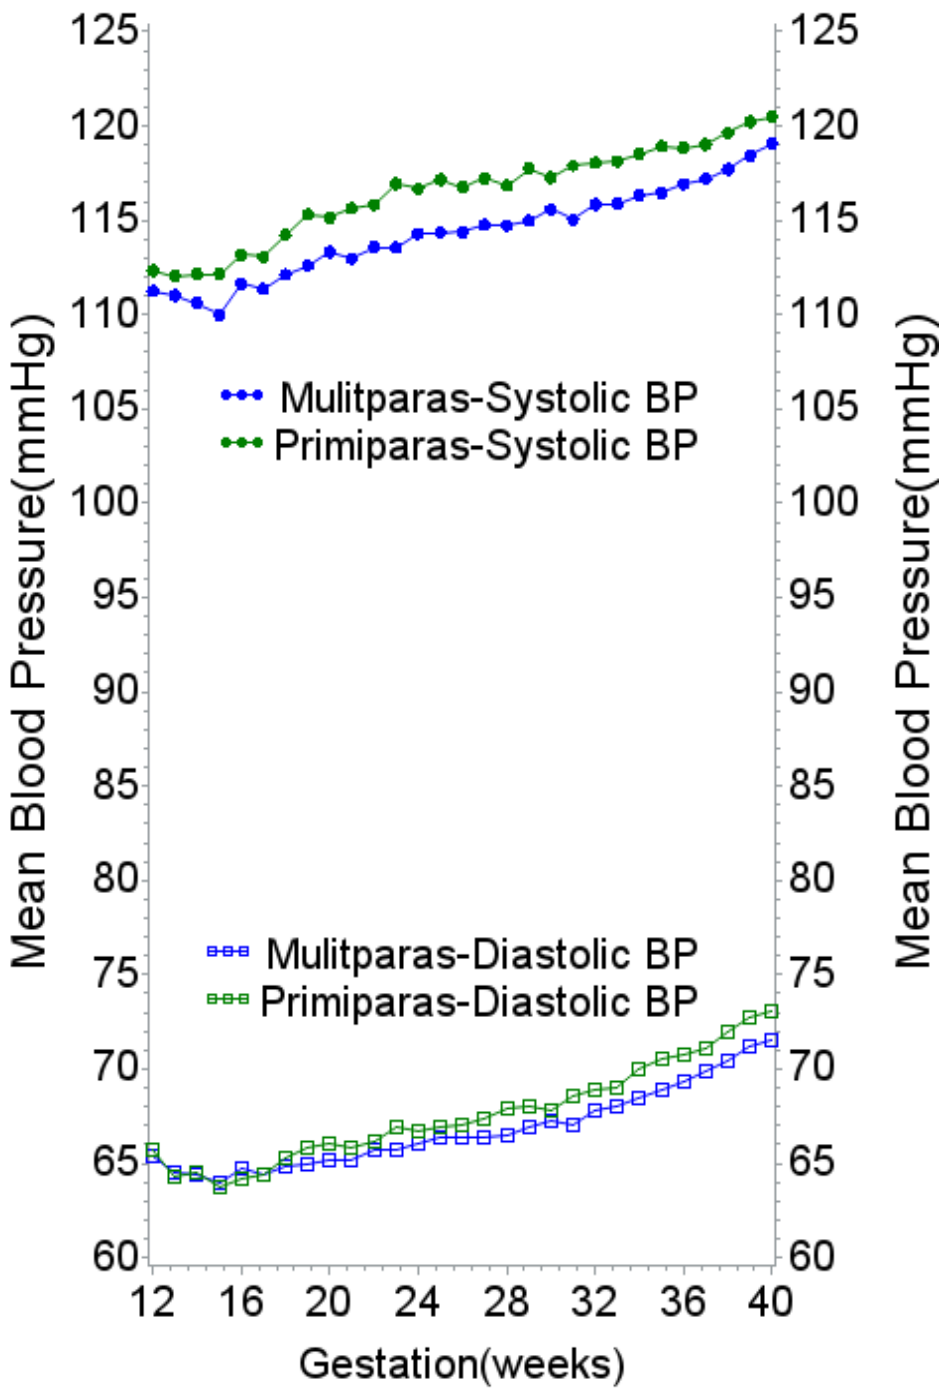

Supplemental Figure 2. Mean blood pressure levels by week of gestation and parity.
